# Supplementary material
Source: PubMed Central journal article supplement (PMC4839211)
Supplement: supp_db15-0996_DB150996SupplementaryData.pdf [file supp_db15-0996_DB150996SupplementaryData.pdf]

Supplementary Table 1 – Causal framework for testing various explanations for the association between methylation at *HIF3A* and body mass index

|                                                                   | Cross-sectional analysis |                | Longitudinal analysis                 |                                       | Mendelian randomization analysis |            | Inter-generational analysis |                                    |                                  |                                  |
|-------------------------------------------------------------------|--------------------------|----------------|---------------------------------------|---------------------------------------|----------------------------------|------------|-----------------------------|------------------------------------|----------------------------------|----------------------------------|
|                                                                   | Basic model              | Adjusted model | <i>HIF3A</i> baseline – BMI follow-up | BMI baseline – <i>HIF3A</i> follow-up | IV for methylation               | IV for BMI | IV for maternal BMI         | IV adjusted for offspring genotype | Independent maternal association | Independent paternal association |
| Analysis confounded by socio-economic and lifestyle factors       |                          |                |                                       |                                       |                                  |            |                             |                                    |                                  |                                  |
| <i>HIF3A</i> with causal effect on BMI                            |                          |                |                                       |                                       |                                  |            |                             |                                    |                                  |                                  |
| BMI with causal effect on <i>HIF3A</i>                            |                          |                |                                       |                                       |                                  |            |                             |                                    |                                  |                                  |
| Bidirectional causal effect                                       |                          |                |                                       |                                       |                                  |            |                             |                                    |                                  |                                  |
| BMI – <i>HIF3A</i> association confounded by intra-uterine effect |                          |                |                                       |                                       |                                  |            |                             |                                    |                                  |                                  |

Unfilled boxes represent no associations observed in the outlined analyses, dark filled boxes represent strong evidence of association and light filled boxes represent weak evidence of association.

Supplementary Table 2 - Associations between methylation at cg27146050 in adolescence and potential confounding factors

| Confounder                              | Group                  | Methylation at cg27146050 (N=974) <sup>†</sup> |                   |
|-----------------------------------------|------------------------|------------------------------------------------|-------------------|
|                                         |                        | Mean                                           | P-value for trend |
| Adolescent age                          | <17 years              | 0.172                                          | 0.006             |
|                                         | ≥17 years              | 0.165                                          |                   |
| Sex                                     | Male                   | 0.171                                          | <0.001            |
|                                         | Female                 | 0.162                                          |                   |
| Birthweight                             | Low                    | 0.168                                          | 0.001             |
|                                         | Normal                 | 0.165                                          |                   |
|                                         | Macrosomia             | 0.176                                          |                   |
| Gestational age                         | Pre-term               | 0.165                                          | 0.88              |
|                                         | Term                   | 0.167                                          |                   |
|                                         | Post-term              | 0.162                                          |                   |
| Maternal education                      | No degree              | 0.168                                          | 0.08              |
|                                         | Degree                 | 0.163                                          |                   |
| Household social class                  | Manual                 | 0.170                                          | 0.22              |
|                                         | Not manual             | 0.166                                          |                   |
| Adolescent smoking status               | Never/less than weekly | 0.167                                          | 0.77              |
|                                         | Weekly                 | 0.171                                          |                   |
|                                         | Daily                  | 0.166                                          |                   |
| Adolescent alcohol consumption          | Less than weekly       | 0.166                                          | 0.79              |
|                                         | At least weekly        | 0.167                                          |                   |
| Maternal smoking during pregnancy       | Never                  | 0.168                                          | 0.03              |
|                                         | Any                    | 0.162                                          |                   |
| Maternal alcohol during first trimester | Never                  | 0.168                                          | 0.28              |
|                                         | Any                    | 0.166                                          |                   |

<sup>†</sup>N varies from 792 to 974 depending on completeness of data.

Supplementary Table 3 – Associations between methylation at cg27146050 and BMI in adolescence with adjustment for cell composition

| Model                       | N   | Without adjustment for cell composition        |         | With adjustment for cell composition           |         |
|-----------------------------|-----|------------------------------------------------|---------|------------------------------------------------|---------|
|                             |     | Percentage change in BMI (95% CI) <sup>c</sup> | p-value | Percentage change in BMI (95% CI) <sup>c</sup> | p-value |
| Basic model <sup>a</sup>    | 845 | 4.66 (1.04, 8.29)                              | 0.012   | 5.27 (1.62, 8.92)                              | 0.005   |
| Adjusted model <sup>b</sup> | 804 | 3.49 (-0.12, 7.10)                             | 0.058   | 4.01 (0.37, 7.64)                              | 0.031   |

<sup>a</sup> adjusted for age, sex, smoking and batch

<sup>b</sup> adjusted for age, sex, smoking, batch, alcohol, maternal education, social class, maternal smoking, maternal alcohol, birthweight and gestational age

<sup>c</sup> Coefficients have been converted into percentage change in BMI for every 0.1 unit increase in methylation  $\beta$  value.

Supplementary Table 4- Associations between methylation at three CpG sites at *HIF3A* and FMI in adolescence

|            | Basic model (N=829) <sup>a</sup>               |         | Adjusted model (N=789) <sup>b</sup>            |         |
|------------|------------------------------------------------|---------|------------------------------------------------|---------|
|            | Percentage change in BMI (95% CI) <sup>c</sup> | p-value | Percentage change in BMI (95% CI) <sup>c</sup> | p-value |
| cg22890170 | 2.84 (-0.37, 6.05)                             | 0.08    | 1.99 (-1.28, 5.25)                             | 0.23    |
| cg27146050 | 11.79 (-0.15, 23.72)                           | 0.05    | 8.86 (-3.27, 20.98)                            | 0.15    |
| cg16672562 | 1.87 (-0.77, 4.52)                             | 0.17    | 1.55 (-1.16, 4.26)                             | 0.26    |

<sup>a</sup> Adjusted for age, sex, smoking and batch.

<sup>b</sup> Basic model additionally adjusted for smoking, alcohol, maternal education, social class, maternal smoking, maternal smoking, maternal alcohol, birthweight and gestational age.

<sup>c</sup> Coefficients have been converted into percentage change in BMI for every 0.1 unit increase in methylation  $\beta$  value.

Supplementary Table 5 - Prospective associations between childhood BMI and adolescent methylation, and between childhood methylation and adolescent BMI, adjusted for potential confounding factors

| Exposure              | Outcome                | CpG site   | N   | Association without adjustment for the outcome at baseline * |         | N   | Association with adjustment for the outcome at baseline * |         |
|-----------------------|------------------------|------------|-----|--------------------------------------------------------------|---------|-----|-----------------------------------------------------------|---------|
|                       |                        |            |     | $\beta$ (95% CI)                                             | p-value |     | $\beta$ (95% CI)                                          | p-value |
| Birth methylation     | Childhood BMI          | cg22891070 | 825 | -1.74 (-3.69, 0.25) <sup>a</sup>                             | 0.09    | 814 | -1.54 (-3.46, 0.43) <sup>a</sup>                          | 0.09    |
|                       |                        | cg27146050 | 825 | -0.06 (-1.10, 0.99) <sup>a</sup>                             | 0.91    | 814 | 0.22 (-0.82, 1.27) <sup>a</sup>                           | 0.67    |
|                       |                        | cg16672562 | 825 | -2.54 (-4.95, -0.06) <sup>a</sup>                            | 0.04    | 814 | -2.50 (-4.87, -0.07) <sup>a</sup>                         | 0.07    |
| Birth weight          | Childhood methylation  | cg22891070 | 892 | 0.02 (0.003, 0.04) <sup>b</sup>                              | 0.02    | 811 | 0.02 (0.001, 0.034) <sup>b</sup>                          | 0.02    |
|                       |                        | cg27146050 | 892 | 0.01 (0.0003, 0.01) <sup>b</sup>                             | 0.04    | 811 | 0.01 (0.002, 0.013) <sup>b</sup>                          | 0.04    |
|                       |                        | cg16672562 | 892 | 0.03 (0.01, 0.05) <sup>b</sup>                               | 0.01    | 811 | 0.02 (0.003, 0.045) <sup>b</sup>                          | 0.01    |
| Childhood methylation | Adolescent BMI         | cg22891070 | 872 | 0.53 (-0.55, 1.60) <sup>a</sup>                              | 0.34    | 869 | 0.03 (-0.82, 0.77) <sup>a</sup>                           | 0.95    |
|                       |                        | cg27146050 | 872 | 1.60 (-1.47, 4.68) <sup>a</sup>                              | 0.31    | 869 | 0.78 (-1.50, 3.06) <sup>a</sup>                           | 0.50    |
|                       |                        | cg16672562 | 872 | 0.16 (-0.68, 1.00) <sup>a</sup>                              | 0.70    | 869 | -0.21 (-0.83, 0.42) <sup>a</sup>                          | 0.51    |
| Childhood BMI         | Adolescent methylation | cg22891070 | 919 | 0.005 (-0.002, 0.013) <sup>c</sup>                           | 0.15    | 886 | 0.001 (-0.005, 0.006) <sup>c</sup>                        | 0.83    |
|                       |                        | cg27146050 | 919 | 0.003 (0.001, 0.005) <sup>c</sup>                            | 0.001   | 886 | 0.003 (0.001, 0.004) <sup>c</sup>                         | 0.001   |
|                       |                        | cg16672562 | 919 | 0.007 (-0.002, 0.016) <sup>c</sup>                           | 0.12    | 886 | 0.003 (-0.004, 0.009) <sup>c</sup>                        | 0.39    |

\* Also adjusted for age in childhood/adolescence, sex, batch, maternal education, social class, maternal smoking, maternal alcohol, birthweight and gestational age

<sup>a</sup> Coefficients have been converted into percentage change in BMI for every 0.1 unit increase in methylation  $\beta$  value.

<sup>b</sup> Coefficients are change in methylation per 1kg increase in birthweight.

<sup>c</sup> Coefficients are change in methylation per 10% increase in BMI.

Supplementary Table 6 - Association between SNPs at the HIF3A locus and methylation level at cg27146050 in adolescence

| Exposure                   | N   | Frequency of effect allele <sup>a</sup> | b (95% CI)                        | p-value            | R <sup>2</sup> <sup>c</sup> | F-statistic |
|----------------------------|-----|-----------------------------------------|-----------------------------------|--------------------|-----------------------------|-------------|
| rs8102595                  | 849 | 0.099                                   | 0.023 (0.018, 0.028) <sup>b</sup> | <10 <sup>-10</sup> | 8.0%                        | 73.4        |
| rs3826795                  | 849 | 0.780                                   | 0.007 (0.003, 0.011) <sup>b</sup> | 0.001              | 1.4%                        | 12.0        |
| cis SNP score <sup>†</sup> | 849 | -                                       | 0.204 (0.155, 0.252)              | <10 <sup>-10</sup> | 7.4%                        | 67.6        |

These models were adjusted for batch, except when calculating R<sup>2</sup> where no covariates were included.

<sup>a</sup> Effect allele for rs8102595 is G; effect allele for rs3826795 is C.

<sup>b</sup> Coefficients are from an additive model and are a unit change in methylation per copy of the effect allele

<sup>c</sup> R<sup>2</sup> is the percentage of variation in methylation that is explained by each SNP.

<sup>†</sup> cis SNP score = 0.075 x rs8102595 + 0.047 x rs3826795 (using weights from a meta-analysis of the discovery and replication cohorts in Dick et al (6)).

Supplementary Table 7 – Associations between BMI allele scores and BMI in adolescence

|                                             | Mean allele score (s.d.) | b (95% CI) <sup>a</sup> | p-value            | R <sup>2</sup> <sup>b</sup> | F-statistic | N   |
|---------------------------------------------|--------------------------|-------------------------|--------------------|-----------------------------|-------------|-----|
| Adolescent standardised 97 SNP allele score | 88.7 (6.2) <sup>c</sup>  | 0.036 (0.025, 0.046)    | <10 <sup>-10</sup> | 5.2%                        | 45.7        | 831 |

<sup>a</sup> Coefficients are change in log(BMI) per unit increase in the standardised allele score.

<sup>b</sup> R<sup>2</sup> is the percentage of variation in methylation that is explained by the allele score.

<sup>c</sup> BMI allele scores are always standardised except when reporting the mean and s.d. of the allele score.

Supplementary Table 8 - Associations between body mass index, fat mass index, and genetic variants and possible confounding factors<sup>†</sup>

| Confounder                     | Group                  | Adolescent BMI (kg/m <sup>2</sup> ) (N=952) |                        | Adolescent FMI (kg/m <sup>2</sup> ) (N=935) |                        | Cis-SNP score (N=849) |                        | 97-SNP score (N=849) |                        |
|--------------------------------|------------------------|---------------------------------------------|------------------------|---------------------------------------------|------------------------|-----------------------|------------------------|----------------------|------------------------|
|                                |                        | Mean                                        | P-value for difference | Mean                                        | P-value for difference | Mean                  | P-value for difference | Mean                 | P-value for difference |
| Adolescent age                 | <17 years              | 21.9                                        |                        | 5.90                                        |                        | 0.087                 |                        | 0.00                 |                        |
|                                | ≥17 years              | 22.5                                        | 0.04                   | 5.87                                        | 0.92                   | 0.089                 | 0.58                   | 0.00                 | 0.98                   |
| Sex                            | Male                   | 22.2                                        |                        | 4.17                                        |                        | 0.089                 |                        | 0.04                 |                        |
|                                | Female                 | 22.5                                        | 0.21                   | 7.50                                        | <0.001                 | 0.087                 | 0.39                   | -0.04                | 0.24                   |
| Birth weight                   | Low                    | 20.5                                        |                        | 4.52                                        |                        | 0.098                 |                        | 0.30                 |                        |
|                                | Normal                 | 22.2                                        | <0.001                 | 5.84                                        | 0.08                   | 0.086                 | 0.24                   | -0.02                | 0.20                   |
|                                | High                   | 23.6                                        |                        | 6.28                                        |                        | 0.093                 |                        | 0.09                 |                        |
| Gestational age                | Pre-term               | 21.5                                        |                        | 4.81                                        |                        | 0.010                 |                        | 0.03                 |                        |
|                                | Term                   | 22.3                                        | 0.34                   | 5.90                                        | 0.19                   | 0.088                 | 0.17                   | 0.00                 | 0.83                   |
|                                | Post-term              | 23.6                                        |                        | 7.10                                        |                        | 0.074                 |                        | 0.20                 |                        |
| Maternal education             | No degree              | 22.4                                        |                        | 6.00                                        |                        | 0.089                 |                        | 0.00                 |                        |
|                                | Degree                 | 21.6                                        | 0.006                  | 5.24                                        | 0.007                  | 0.084                 | 0.13                   | 0.00                 | 0.97                   |
| Household social class         | Manual                 | 22.5                                        |                        | 6.27                                        |                        | 0.089                 |                        | 0.01                 |                        |
|                                | Not manual             | 22.2                                        | 0.43                   | 5.77                                        | 0.16                   | 0.089                 | 0.86                   | -0.01                | 0.81                   |
| Adolescent smoking status      | Never/less than weekly | 22.2                                        |                        | 5.77                                        |                        | 0.087                 |                        | -0.03                |                        |
|                                | Weekly                 | 22.9                                        | 0.05                   | 6.45                                        | 0.12                   | 0.090                 | 0.59                   | 0.45                 | 0.04                   |
|                                | Daily                  | 23.1                                        |                        | 6.50                                        |                        | 0.093                 |                        | 0.11                 |                        |
| Adolescent alcohol consumption | Less than weekly       | 22.2                                        |                        | 5.89                                        |                        | 0.089                 |                        | -0.04                |                        |
|                                | At least weekly        | 22.7                                        | 0.13                   | 5.91                                        | 0.95                   | 0.083                 | 0.05                   | 0.11                 | 0.08                   |
|                                | Never                  | 22.2                                        |                        | 5.75                                        |                        | 0.088                 |                        | -0.02                |                        |

|                                         |       |      |      |      |      |       |      |       |      |
|-----------------------------------------|-------|------|------|------|------|-------|------|-------|------|
| Maternal smoking during pregnancy       | Any   | 22.8 | 0.05 | 6.37 | 0.03 | 0.089 | 0.73 | 0.07  | 0.27 |
| Maternal alcohol during first trimester | Never | 22.5 |      | 6.13 |      | 0.089 |      | -0.04 |      |
|                                         | Any   | 22.2 | 0.22 | 5.68 | 0.06 | 0.088 | 0.57 | 0.03  | 0.34 |

† N varies from 694 to 952 depending on completeness of data on confounding factors

Supplementary Table 9 – Mendelian randomization analysis for the association between maternal BMI and offspring methylation at *HIF3A*.

| Instrumental variable (IV)                 | Exposure (E)                   | Outcome (O)                              | Observed association between IV and O (c) |                           | Expected association between IV and O (a x b) | Difference between observed (c) and expected (a x b) estimates |
|--------------------------------------------|--------------------------------|------------------------------------------|-------------------------------------------|---------------------------|-----------------------------------------------|----------------------------------------------------------------|
|                                            |                                |                                          | N                                         | $\beta$ (95% CI)          | $\beta$ (95% CI)                              | P-value                                                        |
| Maternal standardised 97 SNP allele score* | Maternal pre-pregnancy log BMI | Methylation at birth at cg27146050       | 624                                       | -0.0039 (-0.0118, 0.0039) | -0.0011 (-0.0023, 0.0002)                     | 0.46                                                           |
| Maternal standardised 97 SNP allele score* | Maternal pre-pregnancy log BMI | Methylation at birth at cg25196389       | 624                                       | 0.0132 (0.0002, 0.0263)   | 0.0029 (0.0005, 0.0054)                       | 0.11                                                           |
| Maternal standardised 97 SNP allele score* | Maternal pre-pregnancy log BMI | Methylation at birth at cg23548163       | 624                                       | 0.0025 (-0.0074, 0.0124)  | 0.0015 (0.0000, 0.0030)                       | 0.84                                                           |
| Maternal standardised 97 SNP allele score* | Maternal pre-pregnancy log BMI | Methylation at birth at cg26749414       | 624                                       | 0.0095 (-0.0110, 0.0301)  | 0.0064 (0.0022, 0.0105)                       | 0.75                                                           |
| Maternal standardised 97 SNP allele score* | Maternal pre-pregnancy log BMI | Methylation at birth at cg20667364       | 624                                       | 0.0018 (-0.0051, 0.0087)  | 0.0008 (-0.0003, 0.0019)                      | 0.77                                                           |
| Maternal standardised 97 SNP allele score* | Maternal pre-pregnancy log BMI | Methylation at adolescence at cg27146050 | 665                                       | -0.0013 (-0.0042, 0.0015) | 0.0007 (0.0002, 0.0013)                       | 0.16                                                           |

\* Analyses adjusted for offspring allele score.



Supplementary Table 10 – Association analysis of *HIF3A* cis-SNPs with body mass index in GIANT and two-sample Mendelian randomization results

| Instrumental variable (IV)                   | Effect allele | Effect allele frequency | Direct-genotype associations |                | Wald-ratio estimate* |
|----------------------------------------------|---------------|-------------------------|------------------------------|----------------|----------------------|
|                                              |               |                         | N                            | $\beta$ (SE)   | $\beta$ (95% CI)     |
| rs382679                                     | C             | 0.78                    | 224,403                      | 0.002 (0.005)  | 0.33 (-1.03, 1.69)   |
| rs8102595                                    | G             | 0.10                    | 223,534                      | -0.002 (0.007) | -0.08 (-0.65, 0.49)  |
| Inverse-variance fixed effects meta-analysis | -             | -                       | -                            | -              | -0.02 (-0.55, 0.51)  |

\*Estimates for SNP-methylation association taken from ARIES; estimates for SNP-BMI association taken from GIANT meta-analysis results of body mass index. Standard errors for the Wald-ratio estimates were calculated using the delta-method (reference 52 in main paper).

Supplementary Table 11 - Associations between methylation at three CpG sites at *HIF3A* and BMI in adult women

|            | At pregnancy (mean age 29.2 years)<br>Basic model (N=874)* |         | At follow up (mean age 47.4 years)<br>Basic model (N=694)* |         |
|------------|------------------------------------------------------------|---------|------------------------------------------------------------|---------|
|            | Percentage change<br>in BMI (95% CI)                       | p-value | Percentage change in<br>BMI (95% CI)                       | p-value |
| cg22891070 | 0.79 (-0.04, 1.61)                                         | 0.06    | 0.87 (-0.27, 2.02)                                         | 0.14    |
| cg27146050 | 2.17 (-1.26, 5.71)                                         | 0.22    | 2.85 (-1.84, 7.76)                                         | 0.24    |
| cg16672562 | 0.75 (0.03, 1.47)                                          | 0.04    | 0.21 (-0.78, 1.21)                                         | 0.68    |

\*Adjusted for age, smoking and batch.

Coefficients have been converted into percentage change in BMI for every 0.1 unit increase in methylation  $\beta$  value.

Supplementary Figure 1 - Associations between methylation at *HIF3A* CpG sites and BMI

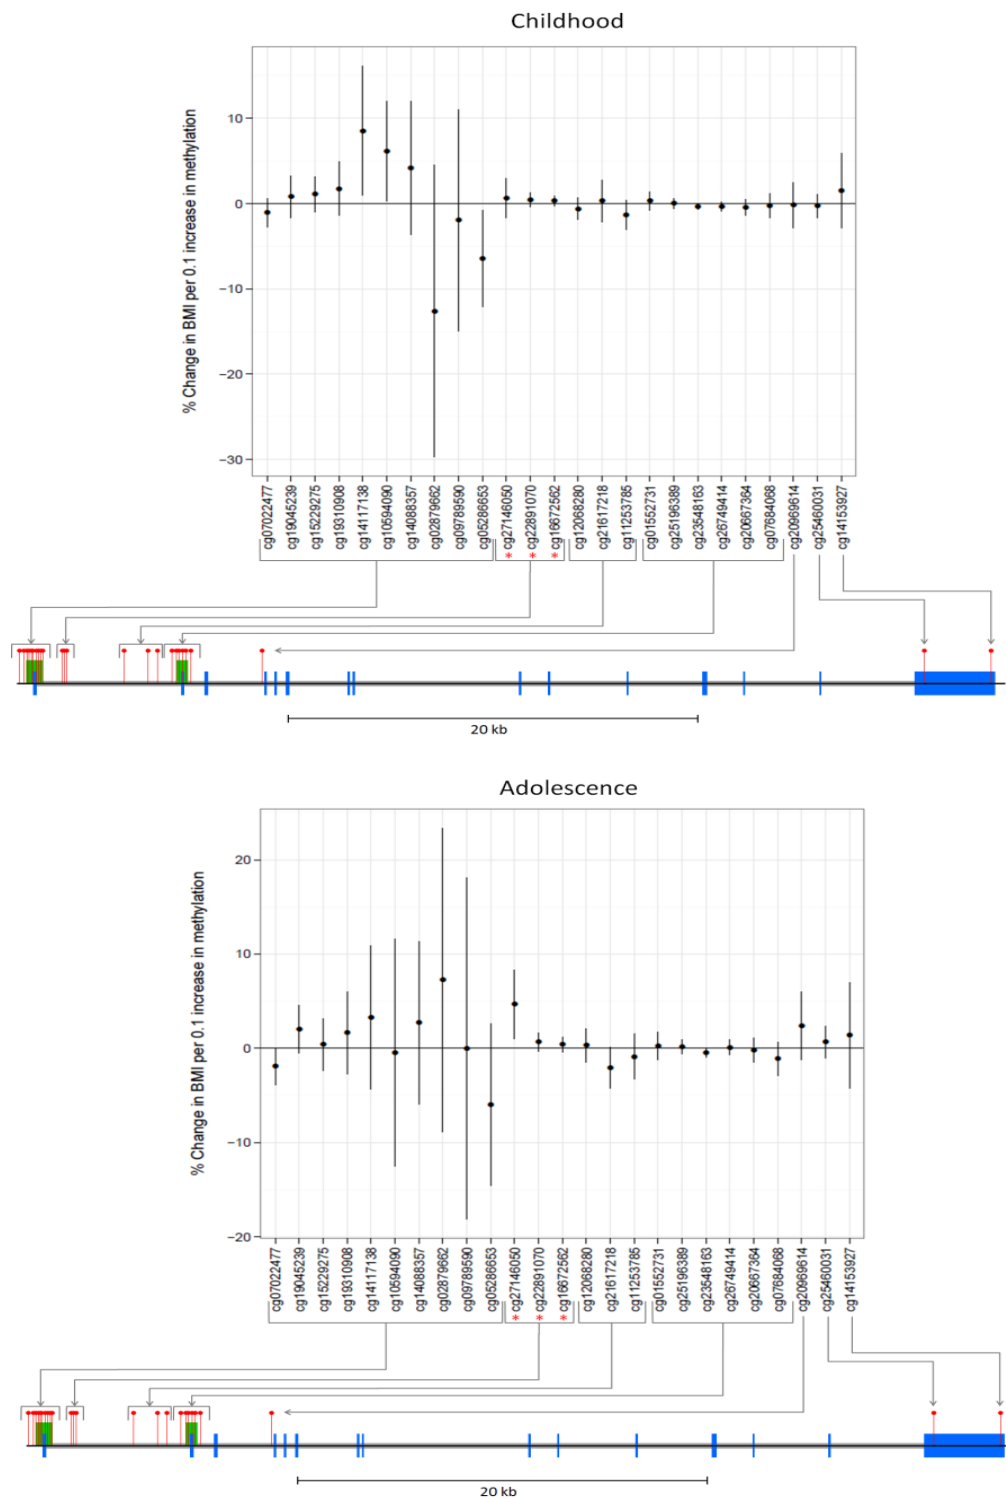

Associations of BMI and peripheral blood methylation at all 25 CpG sites at the *HIF3A* locus in childhood and adolescence. The locations of CpG sites on the *HIF3A* gene are mapped on the diagram below the graph. Blue blocks are exons, grey blocks are introns, green blocks are CpG islands and red pins are CpG sites. The three sites previously identified in adult peripheral blood as associated with own BMI are highlighted with a red asterisk. No other sites survived correction for multiple testing.

Supplementary Figure 2 - A heatmap of the correlation between methylation  $\beta$ -values at each *HIF3A* CpG site at birth.

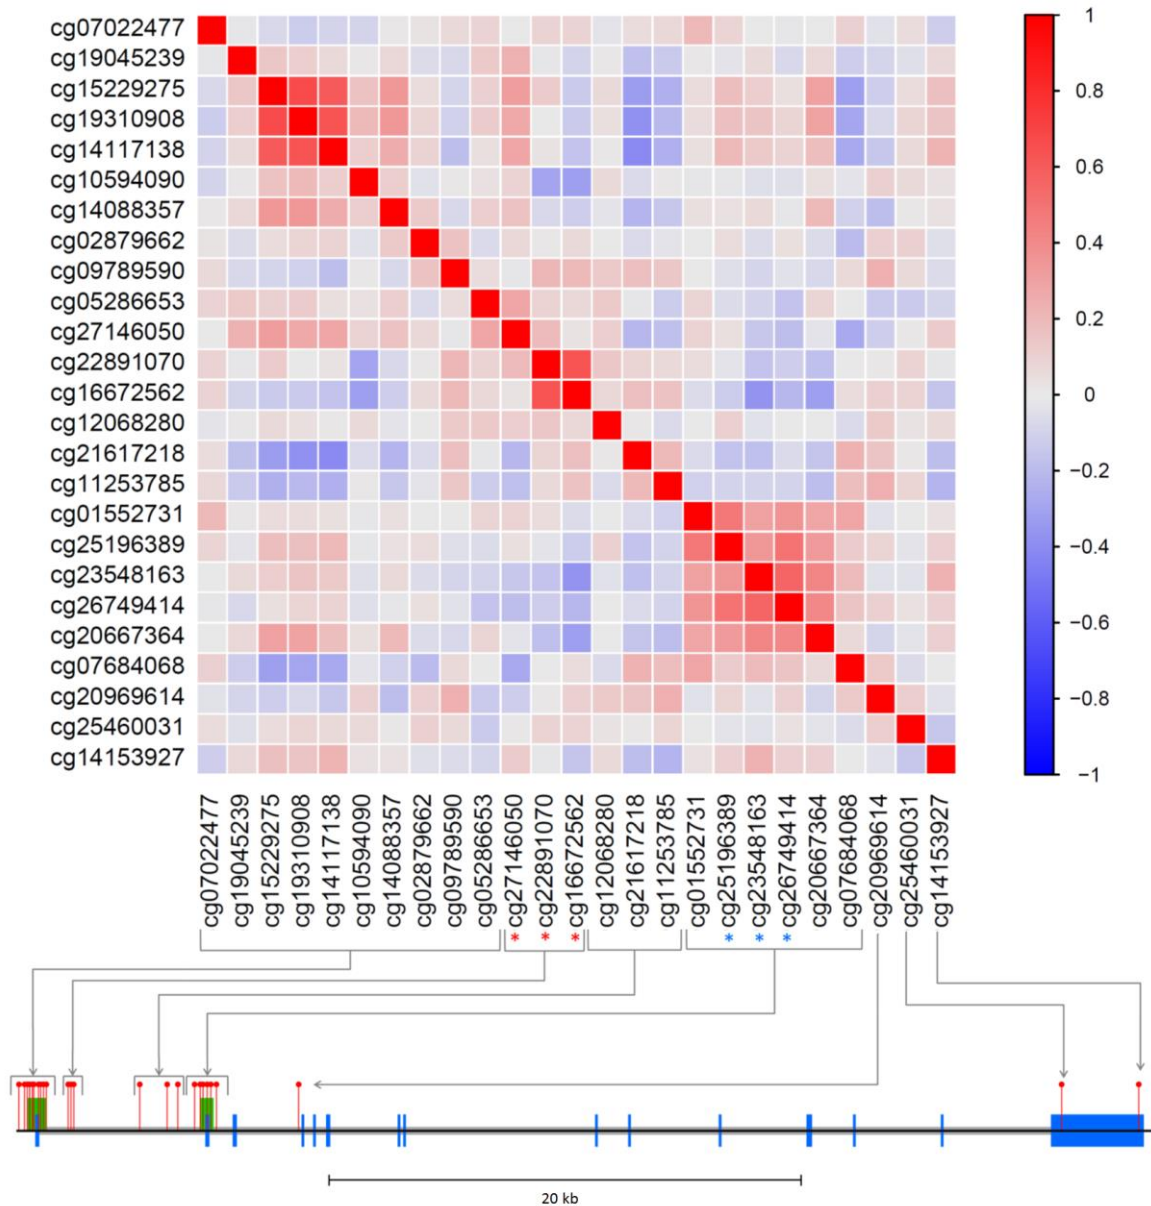

The locations of CpG sites on the *HIF3A* gene are mapped on the diagram below the graph. Blue blocks are exons, grey blocks are introns, green blocks are CpG islands and red pins are CpG sites. The three sites previously identified in adult peripheral blood as associated with own BMI are highlighted with a red asterisk.

Supplementary Figure 3 –Associations between maternal pre-pregnancy BMI and offspring DNA methylation from birth to adolescence\*

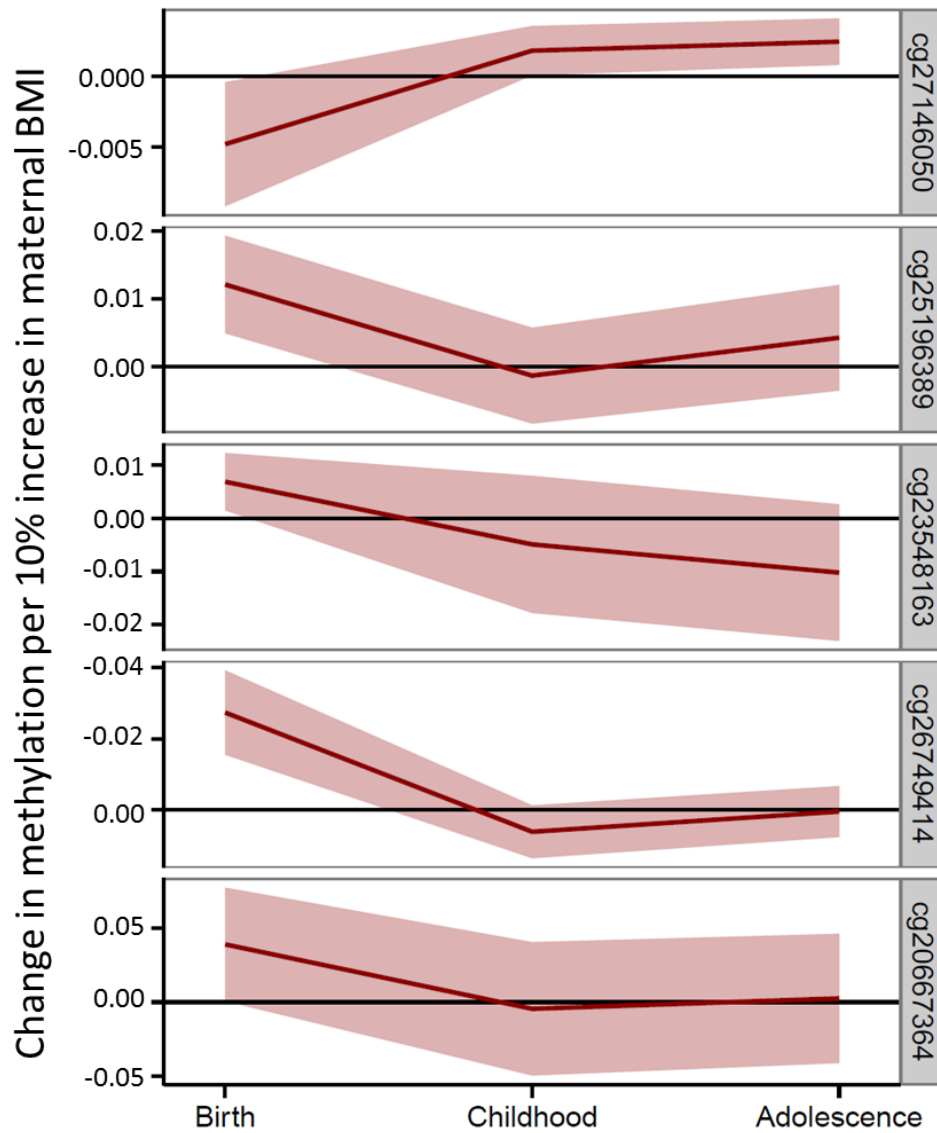

\*birth (cord blood at birth, n=797), childhood (peripheral blood at around 7 years-old, n=846) and adolescence (peripheral blood at around 17 years-old, n=853)  
 Mean change in methylation 10% increase in maternal pre-pregnancy BMI; error bands indicate 95% confidence intervals
